# Supplementary material for: The membrane targeting and spatial activation of Src, Yes and Fyn is influenced by palmitoylation and distinct RhoB/RhoD endosome requirements
Source: Oxford University Press journal article supplement (doi:10.1242/jcs.003657), 2007-07-11
Supplement: jcs003657tables1.pdf [file jcs003657tables1.pdf]

**Table S1. Statistical significance of SFK localization**

| Fig. No.         | Protein           | Treatment         | % of 100 cells expressing protein at periphery | Significance (P value) |
|------------------|-------------------|-------------------|------------------------------------------------|------------------------|
| 1A               | <b>Src-WT</b>     | <b>Serum free</b> | <b>30</b>                                      | <b>P&lt;0.0001</b>     |
|                  | <b>Src-WT</b>     | <b>PDGF</b>       | <b>90</b>                                      |                        |
|                  | Yes-WT            | Serum-free        | 95                                             | P=0.4448               |
|                  | Yes-WT            | PDGF              | 98                                             |                        |
|                  | Fyn-WT            | Serum-free        | 97                                             | P=0.7209               |
| 2A               | <b>Src-WT</b>     | <b>CD + PDGF</b>  | <b>17</b>                                      | <b>P&lt;0.0001</b>     |
|                  | <b>Yes-WT</b>     | <b>CD + PDGF</b>  | <b>7</b>                                       | <b>P&lt;0.0001</b>     |
|                  | <b>Fyn-WT</b>     | <b>CD + PDGF</b>  | <b>20</b>                                      | <b>P&lt;0.0001</b>     |
| 3C               | <b>Src-WT</b>     | <b>RhoB +/+</b>   | <b>75</b>                                      | <b>P&lt;0.0001</b>     |
|                  | <b>Src-WT</b>     | <b>RhoB -/-</b>   | <b>15</b>                                      |                        |
|                  | Yes-WT            | RhoB +/+          | 92                                             | P=0.5679               |
|                  | Yes-WT            | RhoB -/-          | 95                                             |                        |
|                  | Fyn-WT            | RhoB +/+          | 95                                             | P=1.0000               |
| 4A               | Fyn-WT            | RhoB -/-          | 94                                             |                        |
|                  | Src-GFP m         | Serum free        | 93                                             | P=1.0000               |
|                  | Src-GFP m         | PDGF              | 92                                             |                        |
|                  | <b>Fyn-GFP m</b>  | <b>Serum-free</b> | <b>52</b>                                      | <b>P&lt;0.0001</b>     |
|                  | <b>Fyn-GFP m</b>  | <b>PDGF</b>       | <b>90</b>                                      |                        |
| 1A               | <b>Src-WT</b>     | <b>Serum-free</b> | <b>30</b>                                      | <b>P&lt;0.0001</b>     |
| 4A               | <b>Src-GFP m</b>  | <b>Serum-free</b> | <b>93</b>                                      |                        |
| 1A               | Src-WT            | PDGF              | 90                                             | P=0.8056               |
| 4A               | Src-GFP m         | PDGF              | 92                                             |                        |
| 1A               | <b>Fyn-WT</b>     | <b>Serum-free</b> | <b>97</b>                                      | <b>P&lt;0.0001</b>     |
| 4A               | <b>Fyn-GFP m</b>  | <b>Serum-free</b> | <b>52</b>                                      |                        |
| 1A               | Fyn-WT            | PDGF              | 95                                             | P=0.2828               |
| 4A               | Fyn-GFP m         | PDGF              | 90                                             |                        |
| 4C               | Src-GFP m         | RhoB +/+          | 88                                             | P=0.4684               |
|                  | Src-GFP m         | RhoB -/-          | 83                                             |                        |
|                  | Yes C3S           | RhoB +/+          | 100                                            | P=1.0000               |
|                  | Yes C3S           | RhoB -/-          | 100                                            |                        |
|                  | <b>Fyn-GFP m</b>  | <b>RhoB +/+</b>   | <b>80</b>                                      | <b>P&lt;0.0001</b>     |
|                  | <b>Fyn-GFP m</b>  | <b>RhoB -/-</b>   | <b>16</b>                                      |                        |
| 3C               | <b>Src-WT</b>     | <b>RhoB -/-</b>   | <b>15</b>                                      | <b>P&lt;0.0001</b>     |
| 4C               | <b>Src-GFP m</b>  | <b>RhoB -/-</b>   | <b>83</b>                                      |                        |
| 3C               | Yes-WT            | RhoB -/-          | 95                                             | P=0.0594               |
| 4C               | Yes-WT m          | RhoB -/-          | 100                                            |                        |
| 3C               | <b>Fyn-WT</b>     | <b>RhoB -/-</b>   | <b>94</b>                                      | <b>P&lt;0.0001</b>     |
| 4C               | <b>Fyn-GFP m</b>  | <b>RhoB -/-</b>   | <b>16</b>                                      |                        |
| 6                | <b>Src-WT-GFP</b> | <b>PDGF</b>       | <b>94</b>                                      | <b>P&lt;0.0001</b>     |
|                  | <b>Src-WT-GFP</b> | <b>FTI + PDGF</b> | <b>14</b>                                      |                        |
|                  | Fyn-WT-GFP        | PDGF              | 100                                            | P=0.4975               |
|                  | Fyn-WT-GFP        | FTI + PDGF        | 98                                             |                        |
|                  | Src-GFP m         | PDGF              | 92                                             | P=0.3727               |
|                  | Src-GFP m         | FTI + PDGF        | 96                                             |                        |
|                  | <b>Fyn-GFP m</b>  | <b>PDGF</b>       | <b>90</b>                                      | <b>P&lt;0.0001</b>     |
| <b>Fyn-GFP m</b> | <b>FTI + PDGF</b> | <b>10</b>         |                                                |                        |

Statistical significance of results: 100 cells were counted for each condition and a two-tailed *t*-test used to determine 95% confidence intervals. Statistically significant results ( $P<0.0001$ ) are shown in bold.
