# Supplementary material for: The membrane targeting and spatial activation of Src, Yes and Fyn is influenced by palmitoylation and distinct RhoB/RhoD endosome requirements
Source: Oxford University Press journal article supplement (doi:10.1242/jcs.003657), 2007-07-11
Supplement: jcs003657tables2.pdf [file jcs003657tables2.pdf]

**Table S2. Statistical significance of SFK colocalization with RhoB or D**

| <b>Fig. No.</b> | <b>Protein 1</b>                       | <b>Protein 2</b> | <b>% of cells in which proteins colocalize</b> | <b>Significance (<i>P</i> value)</b> |
|-----------------|----------------------------------------|------------------|------------------------------------------------|--------------------------------------|
| 3A              | Src-WT                                 | RhoB             | 98                                             | P=1.0000                             |
|                 | Src-WT                                 | RhoD             | 97                                             |                                      |
|                 | Yes-WT                                 | RhoB             | 10                                             | P=1.0000                             |
|                 | Yes-WT                                 | RhoD             | 10                                             |                                      |
|                 | <b>Fyn-WT</b>                          | <b>RhoB</b>      | <b>80</b>                                      | <b>P=0.0008</b>                      |
|                 | <b>Fyn-WT</b>                          | <b>RhoD</b>      | <b>96</b>                                      |                                      |
| <b>3B</b>       | <b>Fyn-GFP</b>                         | <b>RhoB</b>      | <b>10</b>                                      | <b>P&lt;0.0001</b>                   |
|                 | <b>Fyn-GFP</b>                         | <b>RhoD</b>      | <b>100</b>                                     |                                      |
| <b>4B</b>       | <b>Src-GFP m</b>                       | <b>RhoB</b>      | <b>20</b>                                      | <b>P&lt;0.0001</b>                   |
|                 | <b>Src-GFP m</b>                       | <b>RhoD</b>      | <b>96</b>                                      |                                      |
|                 | <b>Fyn-GFP</b>                         | <b>RhoB</b>      | <b>100</b>                                     | <b>P&lt;0.0001</b>                   |
|                 | <b>m</b><br><b>Fyn-GFP</b><br><b>m</b> | <b>RhoD</b>      | <b>64</b>                                      |                                      |

Statistical significance of results: 100 cells were counted for each condition and a two-tailed *t*-test used to determine 95% confidence intervals. Statistically significant results ( $P<0.0001$ ) are shown in bold.
